# Supplementary material
Source: PubMed Central journal article supplement (PMC2567166)
Supplement: 0806162105_ST1_PDF.pdf [file 0806162105_ST1_PDF.pdf]

| KEGG Code | Category 1 | Category 2 | Category 3        | Category 4         | Species                                                 |
|-----------|------------|------------|-------------------|--------------------|---------------------------------------------------------|
| hsa       | Eukaryotes | Animals    | Vertebrates       | Mammals            | Homo sapiens (human)                                    |
| ptr       | Eukaryotes | Animals    | Vertebrates       | Mammals            | Pan troglodytes (chimpanzee)                            |
| mmu       | Eukaryotes | Animals    | Vertebrates       | Mammals            | Mus musculus (mouse)                                    |
| rno       | Eukaryotes | Animals    | Vertebrates       | Mammals            | Rattus norvegicus (rat)                                 |
| cfa       | Eukaryotes | Animals    | Vertebrates       | Mammals            | Canis familiaris (dog)                                  |
| bta       | Eukaryotes | Animals    | Vertebrates       | Mammals            | Bos taurus (cow)                                        |
| ssc       | Eukaryotes | Animals    | Vertebrates       | Mammals            | Sus scrofa (pig)                                        |
| gga       | Eukaryotes | Animals    | Vertebrates       | Bird               | Gallus gallus (chicken)                                 |
| xla       | Eukaryotes | Animals    | Vertebrates       | Amphibians         | Xenopus laevis (African clawed frog)                    |
| xtr       | Eukaryotes | Animals    | Vertebrates       | Amphibians         | Xenopus tropicalis (western clawed frog)                |
| dre       | Eukaryotes | Animals    | Vertebrates       | Fishes             | Danio rerio (zebrafish)                                 |
| dfnu      | Eukaryotes | Animals    | Vertebrates       | Fishes             | Fugu rubripes (Japanese puffer fish)                    |
| dtni      | Eukaryotes | Animals    | Vertebrates       | Fishes             | Tetraodon nigroviridis (green spotted puffer)           |
| dcin      | Eukaryotes | Animals    | Ascidians         | X                  | Ciona intestinalis (sea squirt)                         |
| ecsv      | Eukaryotes | Animals    | Ascidians         | X                  | Ciona savignyi (EST)                                    |
| emte      | Eukaryotes | Animals    | Ascidians         | X                  | Molgula tectiformis (EST)                               |
| spu       | Eukaryotes | Animals    | Echinoderms       | X                  | Strongylocentrotus purpuratus (purple sea urchin)       |
| espu      | Eukaryotes | Animals    | Echinoderms       | X                  | Strongylocentrotus purpuratus (purple sea urchin) (EST) |
| dme       | Eukaryotes | Animals    | Insects           | X                  | Drosophila melanogaster (fruit fly)                     |
| ddpo      | Eukaryotes | Animals    | Insects           | X                  | Drosophila pseudoobscura                                |
| daga      | Eukaryotes | Animals    | Insects           | X                  | Anopheles gambiae (mosquito)                            |
| dame      | Eukaryotes | Animals    | Insects           | X                  | Apis mellifera (honey bee)                              |
| dbmo      | Eukaryotes | Animals    | Insects           | X                  | Bombyx mori (silkworm)                                  |
| cel       | Eukaryotes | Animals    | Nematodes         | X                  | Caenorhabditis elegans (nematode)                       |
| dabr      | Eukaryotes | Animals    | Nematodes         | X                  | Caenorhabditis briggsae                                 |
| esja      | Eukaryotes | Animals    | Flatworms         | X                  | Schistosoma japonicum (flake) (EST)                     |
| ath       | Eukaryotes | Plants     | Dicotyledons      | mustard family     | Arabidopsis thaliana (thale cress)                      |
| eath      | Eukaryotes | Plants     | Dicotyledons      | mustard family     | Arabidopsis thaliana (thale cress) (EST)                |
| ebna      | Eukaryotes | Plants     | Dicotyledons      | mustard family     | Brassica napus (rape) (EST)                             |
| ecsi      | Eukaryotes | Plants     | Dicotyledons      | rue family         | Citrus sinensis (Valencia orange) (EST)                 |
| egar      | Eukaryotes | Plants     | Dicotyledons      | mallow family      | Gossypium arboreum (cotton) (EST)                       |
| egra      | Eukaryotes | Plants     | Dicotyledons      | mallow family      | Gossypium raimondii (EST)                               |
| egma      | Eukaryotes | Plants     | Dicotyledons      | pea family         | Glycine max (soybean) (EST)                             |
| elco      | Eukaryotes | Plants     | Dicotyledons      | pea family         | Lotus corniculatus (lotus) (EST)                        |
| emtr      | Eukaryotes | Plants     | Dicotyledons      | pea family         | Medicago truncatula (barrel medic) (EST)                |
| eptp      | Eukaryotes | Plants     | Dicotyledons      | willow family      | Populus tremula (aspen) (EST)                           |
| epba      | Eukaryotes | Plants     | Dicotyledons      | willow family      | Populus balsamifera (poplar) (EST)                      |
| ehan      | Eukaryotes | Plants     | Dicotyledons      | daisy family       | Helianthus annuus (sunflower) (EST)                     |
| elsa      | Eukaryotes | Plants     | Dicotyledons      | daisy family       | Lactuca sativa (lettuce) (EST)                          |
| eles      | Eukaryotes | Plants     | Dicotyledons      | nightshade family  | Lycopersicon esculentum (tomato) (EST)                  |
| estu      | Eukaryotes | Plants     | Dicotyledons      | nightshade family  | Solanum tuberosum (potato) (EST)                        |
| evvi      | Eukaryotes | Plants     | Dicotyledons      | grape family       | Vitis vinifera (wine grape) (EST)                       |
| osa       | Eukaryotes | Plants     | Monocotyledons    | grass family       | Oryza sativa japonica (Japanese rice)                   |
| eosa      | Eukaryotes | Plants     | Monocotyledons    | grass family       | Oryza sativa (rice) (EST)                               |
| ehvu      | Eukaryotes | Plants     | Monocotyledons    | grass family       | Hordeum vulgare (barley) (EST)                          |
| etae      | Eukaryotes | Plants     | Monocotyledons    | grass family       | Triticum aestivum (wheat) (EST)                         |
| ezma      | Eukaryotes | Plants     | Monocotyledons    | grass family       | Zea mays (maize) (EST)                                  |
| esof      | Eukaryotes | Plants     | Monocotyledons    | grass family       | Saccharum officinarum (sugarcane) (EST)                 |
| esbi      | Eukaryotes | Plants     | Monocotyledons    | grass family       | Sorghum bicolor (sorghum) (EST)                         |
| epta      | Eukaryotes | Plants     | Other seed plants | pine family        | Pinus taeda (loblolly pine) (EST)                       |
| epgl      | Eukaryotes | Plants     | Other seed plants | pine family        | Picea glauca (white spruce) (EST)                       |
| eppa      | Eukaryotes | Plants     | Mosses            | X                  | Physcomitrella patens (EST)                             |
| eppp      | Eukaryotes | Plants     | Mosses            | X                  | Physcomitrella patens subsp. patens (EST)               |
| cme       | Eukaryotes | Plants     | Red Alga          | X                  | Cyanidioschyzon merolae                                 |
| sce       | Eukaryotes | Fungi      | Ascomycetes       | Saccharomycetes    | Saccharomyces cerevisiae                                |
| dspd      | Eukaryotes | Fungi      | Ascomycetes       | Saccharomycetes    | Saccharomyces paradoxus                                 |
| dsmi      | Eukaryotes | Fungi      | Ascomycetes       | Saccharomycetes    | Saccharomyces mikatae                                   |
| dsba      | Eukaryotes | Fungi      | Ascomycetes       | Saccharomycetes    | Saccharomyces bayanus                                   |
| ago       | Eukaryotes | Fungi      | Ascomycetes       | Saccharomycetes    | Ashbya gossypii (Eremothecium gossypii)                 |
| dkla      | Eukaryotes | Fungi      | Ascomycetes       | Saccharomycetes    | Kluyveromyces lactis                                    |
| dkwa      | Eukaryotes | Fungi      | Ascomycetes       | Saccharomycetes    | Kluyveromyces waltii                                    |
| ddha      | Eukaryotes | Fungi      | Ascomycetes       | Saccharomycetes    | Debaryomyces hansenii                                   |
| cal       | Eukaryotes | Fungi      | Ascomycetes       | Saccharomycetes    | Candida albicans                                        |
| dcgr      | Eukaryotes | Fungi      | Ascomycetes       | Saccharomycetes    | Candida glabrata                                        |
| dyli      | Eukaryotes | Fungi      | Ascomycetes       | Saccharomycetes    | Yarrowia lipolytica                                     |
| spo       | Eukaryotes | Fungi      | Ascomycetes       | Schizosaccharomyce | Schizosaccharomyces pombe                               |
| dncr      | Eukaryotes | Fungi      | Ascomycetes       | Sordariomycete     | Neurospora crassa                                       |

|      |             |          |                     |                                                  |                                          |
|------|-------------|----------|---------------------|--------------------------------------------------|------------------------------------------|
| dmgr | Eukaryotes  | Fungi    | Ascomycetes         | Sordariomycete                                   | Magnaporthe grisea                       |
| ani  | Eukaryotes  | Fungi    | Ascomycetes         | Eurotiales                                       | Aspergillus nidulans                     |
| afm  | Eukaryotes  | Fungi    | Ascomycetes         | Eurotiales                                       | Aspergillus fumigatus                    |
| aor  | Eukaryotes  | Fungi    | Ascomycetes         | Eurotiales                                       | Aspergillus oryzae                       |
| cne  | Eukaryotes  | Fungi    | Basidiomycetes      | X                                                | Cryptococcus neoformans JEC21            |
| dcnb | Eukaryotes  | Fungi    | Basidiomycetes      | X                                                | Cryptococcus neoformans B-3501A          |
| ecu  | Eukaryotes  | Fungi    | Microsporidian      | X                                                | Encephalitozoon cuniculi                 |
| ddi  | Eukaryotes  | Protists | Cellular slime mold | X                                                | Dictyostelium discoideum                 |
| pfa  | Eukaryotes  | Protists | Alveolates          | Apicomplexa                                      | Plasmodium falciparum                    |
| dpvo | Eukaryotes  | Protists | Alveolates          | Apicomplexa                                      | Plasmodium yoelii                        |
| dpkn | Eukaryotes  | Protists | Alveolates          | Apicomplexa                                      | Plasmodium knowlesi                      |
| cpv  | Eukaryotes  | Protists | Alveolates          | Apicomplexa                                      | Cryptosporidium parvum                   |
| cho  | Eukaryotes  | Protists | Alveolates          | Apicomplexa                                      | Cryptosporidium hominis                  |
| tan  | Eukaryotes  | Protists | Alveolates          | Apicomplexa                                      | Theileria annulata                       |
| tpv  | Eukaryotes  | Protists | Alveolates          | Apicomplexa                                      | Theileria parva                          |
| tbr  | Eukaryotes  | Protists | Euglenozoa          | X                                                | Trypanosoma brucei                       |
| tcr  | Eukaryotes  | Protists | Euglenozoa          | X                                                | Trypanosoma cruzi                        |
| lma  | Eukaryotes  | Protists | Euglenozoa          | X                                                | Leishmania major                         |
| ehi  | Eukaryotes  | Protists | Entamoeba           | X                                                | Entamoeba histolytica                    |
| eco  | Prokaryotes | Bacteria | Proteobacteria      | Gamma/enterobacter                               | Escherichia coli K-12 MG1655             |
| ecj  | Prokaryotes | Bacteria | Proteobacteria      | Gamma/enterobacter                               | Escherichia coli K-12 W3110              |
| ece  | Prokaryotes | Bacteria | Proteobacteria      | Gamma/enterobacter                               | Escherichia coli O157 EDL933 (EHEC)      |
| ecs  | Prokaryotes | Bacteria | Proteobacteria      | Gamma/enterobacter                               | Escherichia coli O157 Sakai (EHEC)       |
| ecc  | Prokaryotes | Bacteria | Proteobacteria      | Gamma/enterobacter                               | Escherichia coli CFT073 (UPEC)           |
| eci  | Prokaryotes | Bacteria | Proteobacteria      | Gamma/enterobacter                               | Escherichia coli UT189 (UPEC)            |
| ecp  | Prokaryotes | Bacteria | Proteobacteria      | Gamma/enterobacter                               | Escherichia coli 536 (UPEC)              |
| ecv  | Prokaryotes | Bacteria | Proteobacteria      | Gamma/enterobacter                               | Escherichia coli APEC O1                 |
| sty  | Prokaryotes | Bacteria | Proteobacteria      | Gamma/enterobacter                               | Salmonella enterica serovar Typhi CT18   |
| stt  | Prokaryotes | Bacteria | Proteobacteria      | Gamma/enterobacter                               | Salmonella enterica serovar Typhi Ty2    |
| spt  | Prokaryotes | Bacteria | Proteobacteria      | Gamma/enterobacter                               | Salmonella enterica serovar Paratyphi A  |
| sec  | Prokaryotes | Bacteria | Proteobacteria      | Gamma/enterobacter                               | Salmonella enterica serovar Choleraesuis |
| stm  | Prokaryotes | Bacteria | Proteobacteria      | Gamma/enterobacter                               | Salmonella typhimurium LT2               |
| ype  | Prokaryotes | Bacteria | Proteobacteria      | Gamma/enterobacter                               | Yersinia pestis CO92                     |
| ypk  | Prokaryotes | Bacteria | Proteobacteria      | Gamma/enterobacter                               | Yersinia pestis KIM                      |
| ypm  | Prokaryotes | Bacteria | Proteobacteria      | Gamma/enterobacter                               | Yersinia pestis Mediaevails              |
| ypa  | Prokaryotes | Bacteria | Proteobacteria      | Gamma/enterobacter                               | Yersinia pestis Antiqua                  |
| ypn  | Prokaryotes | Bacteria | Proteobacteria      | Gamma/enterobacter                               | Yersinia pestis Nepal516                 |
| yps  | Prokaryotes | Bacteria | Proteobacteria      | Gamma/enterobacter                               | Yersinia pseudotuberculosis              |
| yen  | Prokaryotes | Bacteria | Proteobacteria      | Gamma/enterobacter                               | Yersinia enterocolitica                  |
| sfl  | Prokaryotes | Bacteria | Proteobacteria      | Gamma/enterobacter                               | Shigella flexneri 301 (serotype 2a)      |
| sfx  | Prokaryotes | Bacteria | Proteobacteria      | Gamma/enterobacter                               | Shigella flexneri 2457T (serotype 2a)    |
| sfv  | Prokaryotes | Bacteria | Proteobacteria      | Gamma/enterobacter                               | Shigella flexneri 8401 (serotype 5b)     |
| ssn  | Prokaryotes | Bacteria | Proteobacteria      | Gamma/enterobacter                               | Shigella sonnei                          |
| sbo  | Prokaryotes | Bacteria | Proteobacteria      | Gamma/enterobacter                               | Shigella boydii                          |
| sdv  | Prokaryotes | Bacteria | Proteobacteria      | Gamma/enterobacter                               | Shigella dysenteriae                     |
| eca  | Prokaryotes | Bacteria | Proteobacteria      | Gamma/enterobacter                               | Erwinia carotovora                       |
| plu  | Prokaryotes | Bacteria | Proteobacteria      | Gamma/enterobacter                               | Photobacterium luminescens               |
| buc  | Prokaryotes | Bacteria | Proteobacteria      | Gamma/enterobacter                               | Buchnera aphidicola APS                  |
| bas  | Prokaryotes | Bacteria | Proteobacteria      | Gamma/enterobacter                               | Buchnera aphidicola Sg                   |
| bab  | Prokaryotes | Bacteria | Proteobacteria      | Gamma/enterobacter                               | Buchnera aphidicola Bp                   |
| bcc  | Prokaryotes | Bacteria | Proteobacteria      | Gamma/enterobacter                               | Buchnera aphidicola Cc                   |
| wbr  | Prokaryotes | Bacteria | Proteobacteria      | Gamma/enterobacter                               | Wigglesworthia glossinidia               |
| sgl  | Prokaryotes | Bacteria | Proteobacteria      | Gamma/enterobacter                               | Sodalis glossinidius                     |
| bfl  | Prokaryotes | Bacteria | Proteobacteria      | Gamma/enterobacter                               | Candidatus Blochmannia floridanus        |
| bpn  | Prokaryotes | Bacteria | Proteobacteria      | Gamma/enterobacter                               | Candidatus Blochmannia pennsylvanicus    |
| hin  | Prokaryotes | Bacteria | Gamma/others        | Haemophilus influenzae (serotype d)              |                                          |
| hit  | Prokaryotes | Bacteria | Gamma/others        | Haemophilus influenzae 86-028NP (nontypeable)    |                                          |
| hdu  | Prokaryotes | Bacteria | Gamma/others        | Haemophilus ducreyi                              |                                          |
| hso  | Prokaryotes | Bacteria | Gamma/others        | Haemophilus somnus                               |                                          |
| pmu  | Prokaryotes | Bacteria | Gamma/others        | Pasteurella multocida                            |                                          |
| msu  | Prokaryotes | Bacteria | Gamma/others        | Mannheimia succiniciproducens                    |                                          |
| apl  | Prokaryotes | Bacteria | Gamma/others        | Actinobacillus pleuropneumoniae                  |                                          |
| xfa  | Prokaryotes | Bacteria | Gamma/others        | Xylella fastidiosa 9a5c                          |                                          |
| xft  | Prokaryotes | Bacteria | Gamma/others        | Xylella fastidiosa Temecula1                     |                                          |
| xcc  | Prokaryotes | Bacteria | Gamma/others        | Xanthomonas campestris pv. campestris ATCC 33913 |                                          |
| xcb  | Prokaryotes | Bacteria | Gamma/others        | Xanthomonas campestris pv. campestris 8004       |                                          |
| xcv  | Prokaryotes | Bacteria | Gamma/others        | Xanthomonas campestris pv. vesicatoria           |                                          |
| xac  | Prokaryotes | Bacteria | Gamma/others        | Xanthomonas axonopodis                           |                                          |

|     |             |          |                |              |                                                  |
|-----|-------------|----------|----------------|--------------|--------------------------------------------------|
| xoo | Prokaryotes | Bacteria | Proteobacteria | Gamma/others | Xanthomonas oryzae KACC10331                     |
| xom | Prokaryotes | Bacteria | Proteobacteria | Gamma/others | Xanthomonas oryzae MAFF311018                    |
| vch | Prokaryotes | Bacteria | Proteobacteria | Gamma/others | Vibrio cholerae                                  |
| vvu | Prokaryotes | Bacteria | Proteobacteria | Gamma/others | Vibrio vulnificus CMCP6                          |
| vyv | Prokaryotes | Bacteria | Proteobacteria | Gamma/others | Vibrio vulnificus YJ016                          |
| vpa | Prokaryotes | Bacteria | Proteobacteria | Gamma/others | Vibrio parahaemolyticus                          |
| vfi | Prokaryotes | Bacteria | Proteobacteria | Gamma/others | Vibrio fischeri                                  |
| ppr | Prokaryotes | Bacteria | Proteobacteria | Gamma/others | Photobacterium profundum                         |
| pae | Prokaryotes | Bacteria | Proteobacteria | Gamma/others | Pseudomonas aeruginosa PAO1                      |
| pau | Prokaryotes | Bacteria | Proteobacteria | Gamma/others | Pseudomonas aeruginosa UCBPP-PA14                |
| ppu | Prokaryotes | Bacteria | Proteobacteria | Gamma/others | Pseudomonas putida                               |
| pst | Prokaryotes | Bacteria | Proteobacteria | Gamma/others | Pseudomonas syringae pv. tomato DC3000           |
| psb | Prokaryotes | Bacteria | Proteobacteria | Gamma/others | Pseudomonas syringae pv. syringae B728a          |
| psp | Prokaryotes | Bacteria | Proteobacteria | Gamma/others | Pseudomonas syringae pv. phaseolicola 1448A      |
| pfl | Prokaryotes | Bacteria | Proteobacteria | Gamma/others | Pseudomonas fluorescens Pf-5                     |
| pfo | Prokaryotes | Bacteria | Proteobacteria | Gamma/others | Pseudomonas fluorescens PfO-1                    |
| pen | Prokaryotes | Bacteria | Proteobacteria | Gamma/others | Pseudomonas entomophila                          |
| par | Prokaryotes | Bacteria | Proteobacteria | Gamma/others | Psychrobacter arcticum                           |
| pcr | Prokaryotes | Bacteria | Proteobacteria | Gamma/others | Psychrobacter cryohalolentis                     |
| aci | Prokaryotes | Bacteria | Proteobacteria | Gamma/others | Acinetobacter sp. ADP1                           |
| acb | Prokaryotes | Bacteria | Proteobacteria | Gamma/others | Acinetobacter baumannii                          |
| son | Prokaryotes | Bacteria | Proteobacteria | Gamma/others | Shewanella oneidensis                            |
| sdn | Prokaryotes | Bacteria | Proteobacteria | Gamma/others | Shewanella denitrificans                         |
| sfr | Prokaryotes | Bacteria | Proteobacteria | Gamma/others | Shewanella frigidimarina                         |
| saz | Prokaryotes | Bacteria | Proteobacteria | Gamma/others | Shewanella amazonensis                           |
| sbl | Prokaryotes | Bacteria | Proteobacteria | Gamma/others | Shewanella baltica                               |
| slo | Prokaryotes | Bacteria | Proteobacteria | Gamma/others | Shewanella loihica                               |
| she | Prokaryotes | Bacteria | Proteobacteria | Gamma/others | Shewanella sp. MR-4                              |
| shm | Prokaryotes | Bacteria | Proteobacteria | Gamma/others | Shewanella sp. MR-7                              |
| shn | Prokaryotes | Bacteria | Proteobacteria | Gamma/others | Shewanella sp. ANA-3                             |
| shw | Prokaryotes | Bacteria | Proteobacteria | Gamma/others | Shewanella sp. W3-18-1                           |
| ilo | Prokaryotes | Bacteria | Proteobacteria | Gamma/others | Idiomarina loihiensis                            |
| cps | Prokaryotes | Bacteria | Proteobacteria | Gamma/others | Colwellia psycherythraea                         |
| pha | Prokaryotes | Bacteria | Proteobacteria | Gamma/others | Pseudoalteromonas haloplanktis                   |
| pat | Prokaryotes | Bacteria | Proteobacteria | Gamma/others | Pseudoalteromonas atlantica                      |
| sde | Prokaryotes | Bacteria | Proteobacteria | Gamma/others | Saccharophagus degradans                         |
| pin | Prokaryotes | Bacteria | Proteobacteria | Gamma/others | Psychromonas ingrahamii                          |
| maq | Prokaryotes | Bacteria | Proteobacteria | Gamma/others | Marinobacter aquaeolei                           |
| cbu | Prokaryotes | Bacteria | Proteobacteria | Gamma/others | Coxiella burnetii                                |
| lpn | Prokaryotes | Bacteria | Proteobacteria | Gamma/others | Legionella pneumophila Philadelphia 1            |
| lpf | Prokaryotes | Bacteria | Proteobacteria | Gamma/others | Legionella pneumophila Lens                      |
| lpp | Prokaryotes | Bacteria | Proteobacteria | Gamma/others | Legionella pneumophila Paris                     |
| mca | Prokaryotes | Bacteria | Proteobacteria | Gamma/others | Methylococcus capsulatus                         |
| ftu | Prokaryotes | Bacteria | Proteobacteria | Gamma/others | Francisella tularensis subsp. tularensis SCHU S4 |
| fft | Prokaryotes | Bacteria | Proteobacteria | Gamma/others | Francisella tularensis subsp. tularensis FSC 198 |
| ftl | Prokaryotes | Bacteria | Proteobacteria | Gamma/others | Francisella tularensis subsp. holarctica LVS     |
| ftf | Prokaryotes | Bacteria | Proteobacteria | Gamma/others | Francisella tularensis subsp. holarctica OSU18   |
| ftn | Prokaryotes | Bacteria | Proteobacteria | Gamma/others | Francisella tularensis subsp. novicida U112      |
| tcx | Prokaryotes | Bacteria | Proteobacteria | Gamma/others | Thiomicrospira crunogena                         |
| noc | Prokaryotes | Bacteria | Proteobacteria | Gamma/others | Nitrosococcus oceani                             |
| aeH | Prokaryotes | Bacteria | Proteobacteria | Gamma/others | Alkalilimnicola ehrlichei                        |
| hha | Prokaryotes | Bacteria | Proteobacteria | Gamma/others | Halorhodospira halophila                         |
| hch | Prokaryotes | Bacteria | Proteobacteria | Gamma/others | Hahella chejuensis                               |
| csa | Prokaryotes | Bacteria | Proteobacteria | Gamma/others | Chromohalobacter salexigens                      |
| abo | Prokaryotes | Bacteria | Proteobacteria | Gamma/others | Alcanivorax borkumensis                          |
| aha | Prokaryotes | Bacteria | Proteobacteria | Gamma/others | Aeromonas hydrophila                             |
| bci | Prokaryotes | Bacteria | Proteobacteria | Gamma/others | Baumannia cicadellinicola                        |
| crp | Prokaryotes | Bacteria | Proteobacteria | Gamma/others | Candidatus Carsonella ruddii                     |
| rma | Prokaryotes | Bacteria | Proteobacteria | Gamma/others | Candidatus Ruthia magnifica                      |
| nme | Prokaryotes | Bacteria | Proteobacteria | Beta         | Neisseria meningitidis MC58 (serogroup B)        |
| nma | Prokaryotes | Bacteria | Proteobacteria | Beta         | Neisseria meningitidis Z2491 (serogroup A)       |
| nmc | Prokaryotes | Bacteria | Proteobacteria | Beta         | Neisseria meningitidis FAM18                     |
| ngo | Prokaryotes | Bacteria | Proteobacteria | Beta         | Neisseria gonorrhoeae                            |
| cvi | Prokaryotes | Bacteria | Proteobacteria | Beta         | Chromobacterium violaceum                        |
| rso | Prokaryotes | Bacteria | Proteobacteria | Beta         | Ralstonia solanacearum                           |
| reu | Prokaryotes | Bacteria | Proteobacteria | Beta         | Ralstonia eutropha JMP134                        |
| reh | Prokaryotes | Bacteria | Proteobacteria | Beta         | Ralstonia eutropha H16                           |
| rme | Prokaryotes | Bacteria | Proteobacteria | Beta         | Ralstonia metallidurans                          |

|     |             |          |                |                   |                                                  |
|-----|-------------|----------|----------------|-------------------|--------------------------------------------------|
| bma | Prokaryotes | Bacteria | Proteobacteria | Beta              | Burkholderia mallei ATCC 23344                   |
| bmv | Prokaryotes | Bacteria | Proteobacteria | Beta              | Burkholderia mallei SAVP1                        |
| bml | Prokaryotes | Bacteria | Proteobacteria | Beta              | Burkholderia mallei NCTC 10229                   |
| bmn | Prokaryotes | Bacteria | Proteobacteria | Beta              | Burkholderia mallei NCTC 10247                   |
| bxe | Prokaryotes | Bacteria | Proteobacteria | Beta              | Burkholderia xenovorans                          |
| bur | Prokaryotes | Bacteria | Proteobacteria | Beta              | Burkholderia sp. 383                             |
| bcn | Prokaryotes | Bacteria | Proteobacteria | Beta              | Burkholderia cenocepacia AU1054                  |
| bch | Prokaryotes | Bacteria | Proteobacteria | Beta              | Burkholderia cenocepacia HI2424                  |
| bam | Prokaryotes | Bacteria | Proteobacteria | Beta              | Burkholderia cepacia                             |
| bps | Prokaryotes | Bacteria | Proteobacteria | Beta              | Burkholderia pseudomallei K96243                 |
| bpm | Prokaryotes | Bacteria | Proteobacteria | Beta              | Burkholderia pseudomallei 1710b                  |
| bpl | Prokaryotes | Bacteria | Proteobacteria | Beta              | Burkholderia pseudomallei 1106a                  |
| bpd | Prokaryotes | Bacteria | Proteobacteria | Beta              | Burkholderia pseudomallei 668                    |
| bte | Prokaryotes | Bacteria | Proteobacteria | Beta              | Burkholderia thailandensis                       |
| bpe | Prokaryotes | Bacteria | Proteobacteria | Beta              | Bordetella pertussis                             |
| bpa | Prokaryotes | Bacteria | Proteobacteria | Beta              | Bordetella parapertussis                         |
| bbr | Prokaryotes | Bacteria | Proteobacteria | Beta              | Bordetella bronchiseptica                        |
| rfr | Prokaryotes | Bacteria | Proteobacteria | Beta              | Rhodoferax ferrireducens                         |
| pol | Prokaryotes | Bacteria | Proteobacteria | Beta              | Polaromonas sp. JS666                            |
| pna | Prokaryotes | Bacteria | Proteobacteria | Beta              | Polaromonas naphthalenivorans                    |
| aav | Prokaryotes | Bacteria | Proteobacteria | Beta              | Acidovorax avenae                                |
| ajs | Prokaryotes | Bacteria | Proteobacteria | Beta              | Acidovorax sp. JS42                              |
| vei | Prokaryotes | Bacteria | Proteobacteria | Beta              | Verminephrobacter eiseniae                       |
| mpt | Prokaryotes | Bacteria | Proteobacteria | Beta              | Methylbium petroleiphilum                        |
| neu | Prokaryotes | Bacteria | Proteobacteria | Beta              | Nitrosomonas europaea                            |
| net | Prokaryotes | Bacteria | Proteobacteria | Beta              | Nitrosomonas eutropha                            |
| nmu | Prokaryotes | Bacteria | Proteobacteria | Beta              | Nitrospira multiformis                           |
| eba | Prokaryotes | Bacteria | Proteobacteria | Beta              | Azoarcus sp. EbN1                                |
| azo | Prokaryotes | Bacteria | Proteobacteria | Beta              | Azoarcus sp. BH72                                |
| dar | Prokaryotes | Bacteria | Proteobacteria | Beta              | Dechloromonas aromatica                          |
| tbd | Prokaryotes | Bacteria | Proteobacteria | Beta              | Thiobacillus denitrificans                       |
| mfa | Prokaryotes | Bacteria | Proteobacteria | Beta              | Methylobacillus flagellatus                      |
| hpy | Prokaryotes | Bacteria | Proteobacteria | Epsilon           | Helicobacter pylori 26695                        |
| hpi | Prokaryotes | Bacteria | Proteobacteria | Epsilon           | Helicobacter pylori J99                          |
| hpa | Prokaryotes | Bacteria | Proteobacteria | Epsilon           | Helicobacter pylori HPAG1                        |
| hhe | Prokaryotes | Bacteria | Proteobacteria | Epsilon           | Helicobacter hepaticus                           |
| hac | Prokaryotes | Bacteria | Proteobacteria | Epsilon           | Helicobacter acinonychis                         |
| wsu | Prokaryotes | Bacteria | Proteobacteria | Epsilon           | Wolinella succinogenes                           |
| tdn | Prokaryotes | Bacteria | Proteobacteria | Epsilon           | Thiomicrospira denitrificans                     |
| cje | Prokaryotes | Bacteria | Proteobacteria | Epsilon           | Campylobacter jejuni NCTC11168                   |
| cjr | Prokaryotes | Bacteria | Proteobacteria | Epsilon           | Campylobacter jejuni RM1221                      |
| cjj | Prokaryotes | Bacteria | Proteobacteria | Epsilon           | Campylobacter jejuni 81-176                      |
| cff | Prokaryotes | Bacteria | Proteobacteria | Epsilon           | Campylobacter fetus                              |
| gsu | Prokaryotes | Bacteria | Proteobacteria | Delta             | Geobacter sulfurreducens                         |
| gme | Prokaryotes | Bacteria | Proteobacteria | Delta             | Geobacter metallireducens                        |
| pca | Prokaryotes | Bacteria | Proteobacteria | Delta             | Pelobacter carbinolicus                          |
| ppd | Prokaryotes | Bacteria | Proteobacteria | Delta             | Pelobacter propionicus                           |
| dvu | Prokaryotes | Bacteria | Proteobacteria | Delta             | Desulfovibrio vulgaris Hildenborough             |
| dvl | Prokaryotes | Bacteria | Proteobacteria | Delta             | Desulfovibrio vulgaris DP4                       |
| dde | Prokaryotes | Bacteria | Proteobacteria | Delta             | Desulfovibrio desulfuricans                      |
| lip | Prokaryotes | Bacteria | Proteobacteria | Delta             | Lawsonia intracellularis                         |
| bba | Prokaryotes | Bacteria | Proteobacteria | Delta             | Bdellovibrio bacteriovorus                       |
| dps | Prokaryotes | Bacteria | Proteobacteria | Delta             | Desulfotalea psychrophila                        |
| ade | Prokaryotes | Bacteria | Proteobacteria | Delta             | Anaeromyxobacter dehalogenans                    |
| mxu | Prokaryotes | Bacteria | Proteobacteria | Delta             | Myxococcus xanthus                               |
| sat | Prokaryotes | Bacteria | Proteobacteria | Delta             | Syntrophus aciditrophicus                        |
| sfu | Prokaryotes | Bacteria | Proteobacteria | Delta             | Syntrophobacter fumaroxidans                     |
| rpr | Prokaryotes | Bacteria | Proteobacteria | Alpha/rickettsias | Rickettsia prowazekii                            |
| rty | Prokaryotes | Bacteria | Proteobacteria | Alpha/rickettsias | Rickettsia typhi                                 |
| rco | Prokaryotes | Bacteria | Proteobacteria | Alpha/rickettsias | Rickettsia conorii                               |
| rfe | Prokaryotes | Bacteria | Proteobacteria | Alpha/rickettsias | Rickettsia felis                                 |
| rbe | Prokaryotes | Bacteria | Proteobacteria | Alpha/rickettsias | Rickettsia bellii                                |
| wol | Prokaryotes | Bacteria | Proteobacteria | Alpha/rickettsias | Wolbachia wMel                                   |
| wbm | Prokaryotes | Bacteria | Proteobacteria | Alpha/rickettsias | Wolbachia wBm                                    |
| ama | Prokaryotes | Bacteria | Proteobacteria | Alpha/rickettsias | Anaplasma marginale                              |
| aph | Prokaryotes | Bacteria | Proteobacteria | Alpha/rickettsias | Anaplasma phagocytophilum                        |
| eru | Prokaryotes | Bacteria | Proteobacteria | Alpha/rickettsias | Ehrlichia ruminantium Welgevonden (South Africa) |
| erw | Prokaryotes | Bacteria | Proteobacteria | Alpha/rickettsias | Ehrlichia ruminantium Welgevonden (France)       |

|     |             |          |                |                     |                                              |
|-----|-------------|----------|----------------|---------------------|----------------------------------------------|
| erg | Prokaryotes | Bacteria | Proteobacteria | Alpha/rickettsias   | Ehrlichia ruminantium Gardel                 |
| ecn | Prokaryotes | Bacteria | Proteobacteria | Alpha/rickettsias   | Ehrlichia canis                              |
| ech | Prokaryotes | Bacteria | Proteobacteria | Alpha/rickettsias   | Ehrlichia chaffeensis                        |
| nse | Prokaryotes | Bacteria | Proteobacteria | Alpha/rickettsias   | Neorickettsia sennetsu                       |
| pub | Prokaryotes | Bacteria | Proteobacteria | Alpha/rickettsias   | Candidatus Pelagibacter ubique               |
| mlo | Prokaryotes | Bacteria | Proteobacteria | Alpha/rhizobacteria | Mesorhizobium loti                           |
| mes | Prokaryotes | Bacteria | Proteobacteria | Alpha/rhizobacteria | Mesorhizobium sp. BNC1                       |
| sme | Prokaryotes | Bacteria | Proteobacteria | Alpha/rhizobacteria | Sinorhizobium meliloti                       |
| atu | Prokaryotes | Bacteria | Proteobacteria | Alpha/rhizobacteria | Agrobacterium tumefaciens C58 (UWash/Dupont) |
| atc | Prokaryotes | Bacteria | Proteobacteria | Alpha/rhizobacteria | Agrobacterium tumefaciens C58 (Cereon)       |
| ret | Prokaryotes | Bacteria | Proteobacteria | Alpha/rhizobacteria | Rhizobium etli                               |
| rle | Prokaryotes | Bacteria | Proteobacteria | Alpha/rhizobacteria | Rhizobium leguminosarum                      |
| bme | Prokaryotes | Bacteria | Proteobacteria | Alpha/rhizobacteria | Brucella melitensis                          |
| bmf | Prokaryotes | Bacteria | Proteobacteria | Alpha/rhizobacteria | Brucella melitensis biovar Abortus           |
| bms | Prokaryotes | Bacteria | Proteobacteria | Alpha/rhizobacteria | Brucella suis                                |
| bmb | Prokaryotes | Bacteria | Proteobacteria | Alpha/rhizobacteria | Brucella abortus                             |
| bj  | Prokaryotes | Bacteria | Proteobacteria | Alpha/rhizobacteria | Bradyrhizobium japonicum                     |
| rpa | Prokaryotes | Bacteria | Proteobacteria | Alpha/rhizobacteria | Rhodopseudomonas palustris CGA009            |
| rpb | Prokaryotes | Bacteria | Proteobacteria | Alpha/rhizobacteria | Rhodopseudomonas palustris HaA2              |
| rpc | Prokaryotes | Bacteria | Proteobacteria | Alpha/rhizobacteria | Rhodopseudomonas palustris BisB18            |
| rp  | Prokaryotes | Bacteria | Proteobacteria | Alpha/rhizobacteria | Rhodopseudomonas palustris BisB5             |
| rpe | Prokaryotes | Bacteria | Proteobacteria | Alpha/rhizobacteria | Rhodopseudomonas palustris BisA53            |
| nwi | Prokaryotes | Bacteria | Proteobacteria | Alpha/rhizobacteria | Nitrobacter winogradskyi                     |
| nha | Prokaryotes | Bacteria | Proteobacteria | Alpha/rhizobacteria | Nitrobacter hamburgensis                     |
| bhe | Prokaryotes | Bacteria | Proteobacteria | Alpha/rhizobacteria | Bartonella henselae                          |
| bqu | Prokaryotes | Bacteria | Proteobacteria | Alpha/rhizobacteria | Bartonella quintana                          |
| bbk | Prokaryotes | Bacteria | Proteobacteria | Alpha/rhizobacteria | Bartonella bacilliformis                     |
| ccr | Prokaryotes | Bacteria | Proteobacteria | Alpha/others        | Caulobacter crescentus                       |
| sil | Prokaryotes | Bacteria | Proteobacteria | Alpha/others        | Silicibacter pomeroyi                        |
| sit | Prokaryotes | Bacteria | Proteobacteria | Alpha/others        | Silicibacter sp. TM1040                      |
| rsp | Prokaryotes | Bacteria | Proteobacteria | Alpha/others        | Rhodobacter sphaeroides 2.4.1                |
| rsh | Prokaryotes | Bacteria | Proteobacteria | Alpha/others        | Rhodobacter sphaeroides ATCC 17029           |
| jan | Prokaryotes | Bacteria | Proteobacteria | Alpha/others        | Jannaschia sp. CCS1                          |
| rde | Prokaryotes | Bacteria | Proteobacteria | Alpha/others        | Roseobacter denitrificans                    |
| pde | Prokaryotes | Bacteria | Proteobacteria | Alpha/others        | Paracoccus denitrificans                     |
| mmr | Prokaryotes | Bacteria | Proteobacteria | Alpha/others        | Maricaulis maris                             |
| hne | Prokaryotes | Bacteria | Proteobacteria | Alpha/others        | Hyphomonas neptunium                         |
| zmo | Prokaryotes | Bacteria | Proteobacteria | Alpha/others        | Zymomonas mobilis                            |
| nar | Prokaryotes | Bacteria | Proteobacteria | Alpha/others        | Novosphingobium aromaticivorans              |
| sal | Prokaryotes | Bacteria | Proteobacteria | Alpha/others        | Sphingopyxis alaskensis                      |
| eli | Prokaryotes | Bacteria | Proteobacteria | Alpha/others        | Erythrobacter litoralis                      |
| gox | Prokaryotes | Bacteria | Proteobacteria | Alpha/others        | Glucobacter oxydans                          |
| gbe | Prokaryotes | Bacteria | Proteobacteria | Alpha/others        | Granulobacter thebesdensis                   |
| rru | Prokaryotes | Bacteria | Proteobacteria | Alpha/others        | Rhodospirillum rubrum                        |
| mag | Prokaryotes | Bacteria | Proteobacteria | Alpha/others        | Magnetospirillum magneticum                  |
| mgm | Prokaryotes | Bacteria | Proteobacteria | Magnetococcus       | Magnetococcus sp. MC-1                       |
| aba | Prokaryotes | Bacteria | Acidobacteria  | X                   | Acidobacteria bacterium                      |
| sus | Prokaryotes | Bacteria | Acidobacteria  | X                   | Solibacter usitatus                          |
| bsu | Prokaryotes | Bacteria | Firmicutes     | Bacillales          | Bacillus subtilis                            |
| bha | Prokaryotes | Bacteria | Firmicutes     | Bacillales          | Bacillus halodurans                          |
| ban | Prokaryotes | Bacteria | Firmicutes     | Bacillales          | Bacillus anthracis Ames                      |
| bar | Prokaryotes | Bacteria | Firmicutes     | Bacillales          | Bacillus anthracis Ames 0581                 |
| baa | Prokaryotes | Bacteria | Firmicutes     | Bacillales          | Bacillus anthracis A2012                     |
| bat | Prokaryotes | Bacteria | Firmicutes     | Bacillales          | Bacillus anthracis Sterne                    |
| bce | Prokaryotes | Bacteria | Firmicutes     | Bacillales          | Bacillus cereus ATCC 14579                   |
| bca | Prokaryotes | Bacteria | Firmicutes     | Bacillales          | Bacillus cereus ATCC 10987                   |
| bcz | Prokaryotes | Bacteria | Firmicutes     | Bacillales          | Bacillus cereus ZK                           |
| bt  | Prokaryotes | Bacteria | Firmicutes     | Bacillales          | Bacillus thuringiensis 97-27                 |
| bt  | Prokaryotes | Bacteria | Firmicutes     | Bacillales          | Bacillus thuringiensis AI Hakam              |
| bli | Prokaryotes | Bacteria | Firmicutes     | Bacillales          | Bacillus licheniformis ATCC 14580            |
| bld | Prokaryotes | Bacteria | Firmicutes     | Bacillales          | Bacillus licheniformis DSM13                 |
| bcl | Prokaryotes | Bacteria | Firmicutes     | Bacillales          | Bacillus clausii                             |
| oih | Prokaryotes | Bacteria | Firmicutes     | Bacillales          | Oceanobacillus iheyensis                     |
| gka | Prokaryotes | Bacteria | Firmicutes     | Bacillales          | Geobacillus kaustophilus                     |
| sau | Prokaryotes | Bacteria | Firmicutes     | Bacillales          | Staphylococcus aureus N315                   |
| sav | Prokaryotes | Bacteria | Firmicutes     | Bacillales          | Staphylococcus aureus Mu50                   |
| sam | Prokaryotes | Bacteria | Firmicutes     | Bacillales          | Staphylococcus aureus MW2                    |
| sar | Prokaryotes | Bacteria | Firmicutes     | Bacillales          | Staphylococcus aureus MRSA252                |

|     |             |          |            |                 |                                                |
|-----|-------------|----------|------------|-----------------|------------------------------------------------|
| sas | Prokaryotes | Bacteria | Firmicutes | Bacillales      | Staphylococcus aureus MSSA476                  |
| sac | Prokaryotes | Bacteria | Firmicutes | Bacillales      | Staphylococcus aureus COL                      |
| sab | Prokaryotes | Bacteria | Firmicutes | Bacillales      | Staphylococcus aureus RF122                    |
| saa | Prokaryotes | Bacteria | Firmicutes | Bacillales      | Staphylococcus aureus USA300                   |
| sao | Prokaryotes | Bacteria | Firmicutes | Bacillales      | Staphylococcus aureus NCTC8325                 |
| sep | Prokaryotes | Bacteria | Firmicutes | Bacillales      | Staphylococcus epidermidis ATCC 12228          |
| ser | Prokaryotes | Bacteria | Firmicutes | Bacillales      | Staphylococcus epidermidis RP62A               |
| sha | Prokaryotes | Bacteria | Firmicutes | Bacillales      | Staphylococcus haemolyticus                    |
| ssp | Prokaryotes | Bacteria | Firmicutes | Bacillales      | Staphylococcus saprophyticus                   |
| lmo | Prokaryotes | Bacteria | Firmicutes | Bacillales      | Listeria monocytogenes EGD-e                   |
| lmf | Prokaryotes | Bacteria | Firmicutes | Bacillales      | Listeria monocytogenes F2365                   |
| lin | Prokaryotes | Bacteria | Firmicutes | Bacillales      | Listeria innocua                               |
| lwe | Prokaryotes | Bacteria | Firmicutes | Bacillales      | Listeria welshimeri SLCC5334                   |
| lla | Prokaryotes | Bacteria | Firmicutes | Lactobacillales | Lactococcus lactis subsp. lactis IL1403        |
| llc | Prokaryotes | Bacteria | Firmicutes | Lactobacillales | Lactococcus lactis subsp. cremoris SK11        |
| llm | Prokaryotes | Bacteria | Firmicutes | Lactobacillales | Lactococcus lactis subsp. cremoris MG1363      |
| spy | Prokaryotes | Bacteria | Firmicutes | Lactobacillales | Streptococcus pyogenes SF370 (serotype M1)     |
| spz | Prokaryotes | Bacteria | Firmicutes | Lactobacillales | Streptococcus pyogenes MGAS5005 (serotype M1)  |
| spm | Prokaryotes | Bacteria | Firmicutes | Lactobacillales | Streptococcus pyogenes MGAS8232 (serotype M18) |
| spg | Prokaryotes | Bacteria | Firmicutes | Lactobacillales | Streptococcus pyogenes MGAS315 (serotype M3)   |
| sps | Prokaryotes | Bacteria | Firmicutes | Lactobacillales | Streptococcus pyogenes SSI-1 (serotype M3)     |
| sph | Prokaryotes | Bacteria | Firmicutes | Lactobacillales | Streptococcus pyogenes MGAS10270 (serotype M3) |
| spi | Prokaryotes | Bacteria | Firmicutes | Lactobacillales | Streptococcus pyogenes MGAS10750 (serotype M3) |
| spj | Prokaryotes | Bacteria | Firmicutes | Lactobacillales | Streptococcus pyogenes MGAS2096 (serotype M3)  |
| spk | Prokaryotes | Bacteria | Firmicutes | Lactobacillales | Streptococcus pyogenes MGAS9429 (serotype M3)  |
| spa | Prokaryotes | Bacteria | Firmicutes | Lactobacillales | Streptococcus pyogenes MGAS10394 (serotype M6) |
| spb | Prokaryotes | Bacteria | Firmicutes | Lactobacillales | Streptococcus pyogenes MGAS6180 (serotype M28) |
| spn | Prokaryotes | Bacteria | Firmicutes | Lactobacillales | Streptococcus pneumoniae TIGR4                 |
| spr | Prokaryotes | Bacteria | Firmicutes | Lactobacillales | Streptococcus pneumoniae R6                    |
| spd | Prokaryotes | Bacteria | Firmicutes | Lactobacillales | Streptococcus pneumoniae D39                   |
| sag | Prokaryotes | Bacteria | Firmicutes | Lactobacillales | Streptococcus agalactiae 2603 (serotype V)     |
| san | Prokaryotes | Bacteria | Firmicutes | Lactobacillales | Streptococcus agalactiae NEM316 (serotype III) |
| sak | Prokaryotes | Bacteria | Firmicutes | Lactobacillales | Streptococcus agalactiae A909 (serotype Ia)    |
| smu | Prokaryotes | Bacteria | Firmicutes | Lactobacillales | Streptococcus mutans                           |
| stc | Prokaryotes | Bacteria | Firmicutes | Lactobacillales | Streptococcus thermophilus CNRZ1066            |
| stl | Prokaryotes | Bacteria | Firmicutes | Lactobacillales | Streptococcus thermophilus LMG18311            |
| ste | Prokaryotes | Bacteria | Firmicutes | Lactobacillales | Streptococcus thermophilus LMD-9               |
| ssa | Prokaryotes | Bacteria | Firmicutes | Lactobacillales | Streptococcus sanguinis                        |
| lpl | Prokaryotes | Bacteria | Firmicutes | Lactobacillales | Lactobacillus plantarum                        |
| ljo | Prokaryotes | Bacteria | Firmicutes | Lactobacillales | Lactobacillus johnsonii                        |
| lac | Prokaryotes | Bacteria | Firmicutes | Lactobacillales | Lactobacillus acidophilus                      |
| lsa | Prokaryotes | Bacteria | Firmicutes | Lactobacillales | Lactobacillus sakei                            |
| lsl | Prokaryotes | Bacteria | Firmicutes | Lactobacillales | Lactobacillus salivarius                       |
| ldb | Prokaryotes | Bacteria | Firmicutes | Lactobacillales | Lactobacillus delbrueckii ATCC 11842           |
| lbu | Prokaryotes | Bacteria | Firmicutes | Lactobacillales | Lactobacillus delbrueckii ATCC BAA-365         |
| lbr | Prokaryotes | Bacteria | Firmicutes | Lactobacillales | Lactobacillus brevis                           |
| lca | Prokaryotes | Bacteria | Firmicutes | Lactobacillales | Lactobacillus casei                            |
| lga | Prokaryotes | Bacteria | Firmicutes | Lactobacillales | Lactobacillus gasseri                          |
| ppe | Prokaryotes | Bacteria | Firmicutes | Lactobacillales | Pediococcus pentosaceus                        |
| efa | Prokaryotes | Bacteria | Firmicutes | Lactobacillales | Enterococcus faecalis                          |
| ooe | Prokaryotes | Bacteria | Firmicutes | Lactobacillales | Oenococcus oeni                                |
| lme | Prokaryotes | Bacteria | Firmicutes | Lactobacillales | Leuconostoc mesenteroides                      |
| cac | Prokaryotes | Bacteria | Firmicutes | Clostridia      | Clostridium acetobutylicum                     |
| cpe | Prokaryotes | Bacteria | Firmicutes | Clostridia      | Clostridium perfringens 13                     |
| cpf | Prokaryotes | Bacteria | Firmicutes | Clostridia      | Clostridium perfringens ATCC 13124             |
| cpr | Prokaryotes | Bacteria | Firmicutes | Clostridia      | Clostridium perfringens SM101                  |
| ctc | Prokaryotes | Bacteria | Firmicutes | Clostridia      | Clostridium tetani E88                         |
| cno | Prokaryotes | Bacteria | Firmicutes | Clostridia      | Clostridium novyi                              |
| cth | Prokaryotes | Bacteria | Firmicutes | Clostridia      | Clostridium thermocellum                       |
| cdf | Prokaryotes | Bacteria | Firmicutes | Clostridia      | Clostridium difficile                          |
| chy | Prokaryotes | Bacteria | Firmicutes | Clostridia      | Carboxydotherrmus hydrogenoformans             |
| dsy | Prokaryotes | Bacteria | Firmicutes | Clostridia      | Desulfotobacterium hafniense                   |
| swo | Prokaryotes | Bacteria | Firmicutes | Clostridia      | Syntrophomonas wolfei                          |
| tte | Prokaryotes | Bacteria | Firmicutes | Clostridia      | Thermoanaerobacter tengcongensis               |
| mta | Prokaryotes | Bacteria | Firmicutes | Clostridia      | Moorella thermoacetica                         |
| mge | Prokaryotes | Bacteria | Firmicutes | Mollicutes      | Mycoplasma genitalium                          |
| mpn | Prokaryotes | Bacteria | Firmicutes | Mollicutes      | Mycoplasma pneumoniae                          |
| mpu | Prokaryotes | Bacteria | Firmicutes | Mollicutes      | Mycoplasma pulmonis                            |

|     |             |          |                |            |                                          |
|-----|-------------|----------|----------------|------------|------------------------------------------|
| mpe | Prokaryotes | Bacteria | Firmicutes     | Mollicutes | Mycoplasma penetrans                     |
| mga | Prokaryotes | Bacteria | Firmicutes     | Mollicutes | Mycoplasma gallisepticum                 |
| mmy | Prokaryotes | Bacteria | Firmicutes     | Mollicutes | Mycoplasma mycoides                      |
| mmo | Prokaryotes | Bacteria | Firmicutes     | Mollicutes | Mycoplasma mobile                        |
| mhy | Prokaryotes | Bacteria | Firmicutes     | Mollicutes | Mycoplasma hyopneumoniae 232             |
| mhj | Prokaryotes | Bacteria | Firmicutes     | Mollicutes | Mycoplasma hyopneumoniae J               |
| mhp | Prokaryotes | Bacteria | Firmicutes     | Mollicutes | Mycoplasma hyopneumoniae 7448            |
| msy | Prokaryotes | Bacteria | Firmicutes     | Mollicutes | Mycoplasma synoviae                      |
| mcp | Prokaryotes | Bacteria | Firmicutes     | Mollicutes | Mycoplasma capricolum                    |
| uur | Prokaryotes | Bacteria | Firmicutes     | Mollicutes | Ureaplasma urealyticum                   |
| poy | Prokaryotes | Bacteria | Firmicutes     | Mollicutes | Phytoplasma OY                           |
| ayw | Prokaryotes | Bacteria | Firmicutes     | Mollicutes | Phytoplasma AYWB                         |
| mfl | Prokaryotes | Bacteria | Firmicutes     | Mollicutes | Mesoplasma florum                        |
| mtu | Prokaryotes | Bacteria | Actinobacteria | X          | Mycobacterium tuberculosis H37Rv         |
| mtc | Prokaryotes | Bacteria | Actinobacteria | X          | Mycobacterium tuberculosis CDC1551       |
| mbo | Prokaryotes | Bacteria | Actinobacteria | X          | Mycobacterium bovis AF2122/97            |
| mbb | Prokaryotes | Bacteria | Actinobacteria | X          | Mycobacterium bovis BCG Pasteur 1173P2   |
| mle | Prokaryotes | Bacteria | Actinobacteria | X          | Mycobacterium leprae                     |
| mpa | Prokaryotes | Bacteria | Actinobacteria | X          | Mycobacterium avium paratuberculosis     |
| mav | Prokaryotes | Bacteria | Actinobacteria | X          | Mycobacterium avium 104                  |
| mmc | Prokaryotes | Bacteria | Actinobacteria | X          | Mycobacterium sp. MCS                    |
| mkm | Prokaryotes | Bacteria | Actinobacteria | X          | Mycobacterium sp. KMS                    |
| msm | Prokaryotes | Bacteria | Actinobacteria | X          | Mycobacterium smegmatis                  |
| mul | Prokaryotes | Bacteria | Actinobacteria | X          | Mycobacterium ulcerans                   |
| mva | Prokaryotes | Bacteria | Actinobacteria | X          | Mycobacterium vanbaalenii                |
| mjl | Prokaryotes | Bacteria | Actinobacteria | X          | Mycobacterium sp. JLS                    |
| cgl | Prokaryotes | Bacteria | Actinobacteria | X          | Corynebacterium glutamicum (Kyowa Hakko) |
| cgb | Prokaryotes | Bacteria | Actinobacteria | X          | Corynebacterium glutamicum (Bielefeld)   |
| cef | Prokaryotes | Bacteria | Actinobacteria | X          | Corynebacterium efficiens                |
| cdi | Prokaryotes | Bacteria | Actinobacteria | X          | Corynebacterium diphtheriae              |
| cjk | Prokaryotes | Bacteria | Actinobacteria | X          | Corynebacterium jeikeium                 |
| nfa | Prokaryotes | Bacteria | Actinobacteria | X          | Nocardia farcinica                       |
| rha | Prokaryotes | Bacteria | Actinobacteria | X          | Rhodococcus sp. RHA1                     |
| sco | Prokaryotes | Bacteria | Actinobacteria | X          | Streptomyces coelicolor                  |
| sma | Prokaryotes | Bacteria | Actinobacteria | X          | Streptomyces avermitilis                 |
| twh | Prokaryotes | Bacteria | Actinobacteria | X          | Tropheryma whipplei Twist                |
| tws | Prokaryotes | Bacteria | Actinobacteria | X          | Tropheryma whipplei TW08/27              |
| lxx | Prokaryotes | Bacteria | Actinobacteria | X          | Leifsonia xyli xyli CTCB07               |
| art | Prokaryotes | Bacteria | Actinobacteria | X          | Arthrobacter sp. FB24                    |
| aau | Prokaryotes | Bacteria | Actinobacteria | X          | Arthrobacter aurescens                   |
| pac | Prokaryotes | Bacteria | Actinobacteria | X          | Propionibacterium acnes                  |
| nca | Prokaryotes | Bacteria | Actinobacteria | X          | Nocardioides sp. JS614                   |
| tfu | Prokaryotes | Bacteria | Actinobacteria | X          | Thermobifida fusca                       |
| fra | Prokaryotes | Bacteria | Actinobacteria | X          | Frankia sp. Ccl3                         |
| fal | Prokaryotes | Bacteria | Actinobacteria | X          | Frankia alni                             |
| ace | Prokaryotes | Bacteria | Actinobacteria | X          | Acidothermus cellulolyticus              |
| blo | Prokaryotes | Bacteria | Actinobacteria | X          | Bifidobacterium longum                   |
| bad | Prokaryotes | Bacteria | Actinobacteria | X          | Bifidobacterium adolescentis             |
| sth | Prokaryotes | Bacteria | Actinobacteria | X          | Symbiobacterium thermophilum             |
| rxu | Prokaryotes | Bacteria | Actinobacteria | X          | Rubrobacter xylanophilus                 |
| fnu | Prokaryotes | Bacteria | Fusobacteria   | X          | Fusobacterium nucleatum                  |
| rba | Prokaryotes | Bacteria | Planctomyces   | X          | Rhodopirellula baltica                   |
| ctr | Prokaryotes | Bacteria | Chlamydia      | X          | Chlamydia trachomatis serovar D          |
| cta | Prokaryotes | Bacteria | Chlamydia      | X          | Chlamydia trachomatis serovar A          |
| cmu | Prokaryotes | Bacteria | Chlamydia      | X          | Chlamydia muridarum                      |
| cpn | Prokaryotes | Bacteria | Chlamydia      | X          | Chlamydomphila pneumoniae CWL029         |
| cpa | Prokaryotes | Bacteria | Chlamydia      | X          | Chlamydomphila pneumoniae AR39           |
| cpj | Prokaryotes | Bacteria | Chlamydia      | X          | Chlamydomphila pneumoniae J138           |
| cpt | Prokaryotes | Bacteria | Chlamydia      | X          | Chlamydomphila pneumoniae TW183          |
| cca | Prokaryotes | Bacteria | Chlamydia      | X          | Chlamydomphila caviae                    |
| cab | Prokaryotes | Bacteria | Chlamydia      | X          | Chlamydomphila abortus                   |
| cfe | Prokaryotes | Bacteria | Chlamydia      | X          | Chlamydomphila felis                     |
| pcu | Prokaryotes | Bacteria | Chlamydia      | X          | Candidatus Protochlamydia amoebophila    |
| bbu | Prokaryotes | Bacteria | Spirochete     | X          | Borrelia burgdorferi                     |
| bga | Prokaryotes | Bacteria | Spirochete     | X          | Borrelia garinii                         |
| baf | Prokaryotes | Bacteria | Spirochete     | X          | Borrelia afzelii                         |
| tpa | Prokaryotes | Bacteria | Spirochete     | X          | Treponema pallidum                       |
| tde | Prokaryotes | Bacteria | Spirochete     | X          | Treponema denticola                      |

|     |             |          |                     |   |                                            |
|-----|-------------|----------|---------------------|---|--------------------------------------------|
| lil | Prokaryotes | Bacteria | Spirochete          | X | Leptospira interrogans serovar lai         |
| lic | Prokaryotes | Bacteria | Spirochete          | X | Leptospira interrogans serovar Copenhageni |
| ljb | Prokaryotes | Bacteria | Spirochete          | X | Leptospira borgpetersenii JB197            |
| lbl | Prokaryotes | Bacteria | Spirochete          | X | Leptospira borgpetersenii L550             |
| syn | Prokaryotes | Bacteria | Cyanobacteria       | X | Synechocystis sp. PCC6803                  |
| syw | Prokaryotes | Bacteria | Cyanobacteria       | X | Synechococcus sp. WH8102                   |
| syc | Prokaryotes | Bacteria | Cyanobacteria       | X | Synechococcus elongatus PCC6301            |
| syf | Prokaryotes | Bacteria | Cyanobacteria       | X | Synechococcus elongatus PCC7942            |
| syd | Prokaryotes | Bacteria | Cyanobacteria       | X | Synechococcus sp. CC9605                   |
| sye | Prokaryotes | Bacteria | Cyanobacteria       | X | Synechococcus sp. CC9902                   |
| syg | Prokaryotes | Bacteria | Cyanobacteria       | X | Synechococcus sp. CC9311                   |
| cya | Prokaryotes | Bacteria | Cyanobacteria       | X | Cyanobacteria Yellowstone A-Prime          |
| cyb | Prokaryotes | Bacteria | Cyanobacteria       | X | Cyanobacteria Yellowstone B-Prime          |
| tel | Prokaryotes | Bacteria | Cyanobacteria       | X | Thermosynechococcus elongatus              |
| gvi | Prokaryotes | Bacteria | Cyanobacteria       | X | Gloeobacter violaceus                      |
| ana | Prokaryotes | Bacteria | Cyanobacteria       | X | Anabaena sp. PCC7120                       |
| ava | Prokaryotes | Bacteria | Cyanobacteria       | X | Anabaena variabilis                        |
| pma | Prokaryotes | Bacteria | Cyanobacteria       | X | Prochlorococcus marinus SS120              |
| pmm | Prokaryotes | Bacteria | Cyanobacteria       | X | Prochlorococcus marinus MED4               |
| pmt | Prokaryotes | Bacteria | Cyanobacteria       | X | Prochlorococcus marinus MIT9313            |
| pmn | Prokaryotes | Bacteria | Cyanobacteria       | X | Prochlorococcus marinus NATL2A             |
| pmi | Prokaryotes | Bacteria | Cyanobacteria       | X | Prochlorococcus marinus MIT9312            |
| pmb | Prokaryotes | Bacteria | Cyanobacteria       | X | Prochlorococcus marinus AS9601             |
| pmc | Prokaryotes | Bacteria | Cyanobacteria       | X | Prochlorococcus marinus MIT 9515           |
| pmf | Prokaryotes | Bacteria | Cyanobacteria       | X | Prochlorococcus marinus MIT 9303           |
| pmg | Prokaryotes | Bacteria | Cyanobacteria       | X | Prochlorococcus marinus MIT 9301           |
| pme | Prokaryotes | Bacteria | Cyanobacteria       | X | Prochlorococcus marinus NATL1A             |
| ter | Prokaryotes | Bacteria | Cyanobacteria       | X | Trichodesmium erythraeum                   |
| bth | Prokaryotes | Bacteria | Bacteroides         | X | Bacteroides thetaiotaomicron               |
| bfr | Prokaryotes | Bacteria | Bacteroides         | X | Bacteroides fragilis YCH46                 |
| bfs | Prokaryotes | Bacteria | Bacteroides         | X | Bacteroides fragilis NCTC9343              |
| pgi | Prokaryotes | Bacteria | Bacteroides         | X | Porphyromonas gingivalis                   |
| sru | Prokaryotes | Bacteria | Bacteroides         | X | Salinibacter ruber                         |
| chu | Prokaryotes | Bacteria | Bacteroides         | X | Cytophaga hutchinsonii                     |
| gfo | Prokaryotes | Bacteria | Bacteroides         | X | Gramella forsetii                          |
| cte | Prokaryotes | Bacteria | Green sulfur bacter | X | Chlorobium tepidum                         |
| cch | Prokaryotes | Bacteria | Green sulfur bacter | X | Chlorobium chlorochromatii                 |
| cph | Prokaryotes | Bacteria | Green sulfur bacter | X | Chlorobium phaeobacteroides                |
| plt | Prokaryotes | Bacteria | Green sulfur bacter | X | Pelodictyon luteolum                       |
| det | Prokaryotes | Bacteria | Green nonsulfur ba  | X | Dehalococcoides ethenogenes                |
| deh | Prokaryotes | Bacteria | Green nonsulfur ba  | X | Dehalococcoides CBDB1                      |
| dra | Prokaryotes | Bacteria | Deinococcus-Therr   | X | Deinococcus radiodurans                    |
| dge | Prokaryotes | Bacteria | Deinococcus-Therr   | X | Deinococcus geothermalis                   |
| tth | Prokaryotes | Bacteria | Deinococcus-Therr   | X | Thermus thermophilus HB27                  |
| tth | Prokaryotes | Bacteria | Deinococcus-Therr   | X | Thermus thermophilus HB8                   |
| aae | Prokaryotes | Bacteria | Hyperthermophilic I | X | Aquifex aeolicus                           |
| tma | Prokaryotes | Bacteria | Hyperthermophilic I | X | Thermotoga maritima                        |
| mja | Prokaryotes | Archaea  | Euryarchaeota       | X | Methanococcus jannaschii                   |
| mmp | Prokaryotes | Archaea  | Euryarchaeota       | X | Methanococcus maripaludis                  |
| mac | Prokaryotes | Archaea  | Euryarchaeota       | X | Methanosarcina acetivorans                 |
| mba | Prokaryotes | Archaea  | Euryarchaeota       | X | Methanosarcina barkeri                     |
| mma | Prokaryotes | Archaea  | Euryarchaeota       | X | Methanosarcina mazei                       |
| mbu | Prokaryotes | Archaea  | Euryarchaeota       | X | Methanococcoides burtonii                  |
| mtp | Prokaryotes | Archaea  | Euryarchaeota       | X | Methanosaeta thermophila                   |
| mhu | Prokaryotes | Archaea  | Euryarchaeota       | X | Methanospirillum hungatei                  |
| mha | Prokaryotes | Archaea  | Euryarchaeota       | X | Methanocorpusculum labreanum               |
| mem | Prokaryotes | Archaea  | Euryarchaeota       | X | Methanoculleus marisnigri                  |
| mth | Prokaryotes | Archaea  | Euryarchaeota       | X | Methanobacterium thermoautotrophicum       |
| mst | Prokaryotes | Archaea  | Euryarchaeota       | X | Methanosphaera stadtmanae                  |
| mka | Prokaryotes | Archaea  | Euryarchaeota       | X | Methanopyrus kandleri                      |
| afu | Prokaryotes | Archaea  | Euryarchaeota       | X | Archaeoglobus fulgidus                     |
| hal | Prokaryotes | Archaea  | Euryarchaeota       | X | Halobacterium sp. NRC-1                    |
| hma | Prokaryotes | Archaea  | Euryarchaeota       | X | Haloarcula marismortui                     |
| hwa | Prokaryotes | Archaea  | Euryarchaeota       | X | Haloquadratum walsbyi                      |
| nph | Prokaryotes | Archaea  | Euryarchaeota       | X | Natronomonas pharaonis                     |
| tac | Prokaryotes | Archaea  | Euryarchaeota       | X | Thermoplasma acidophilum                   |
| tvo | Prokaryotes | Archaea  | Euryarchaeota       | X | Thermoplasma volcanium                     |
| pto | Prokaryotes | Archaea  | Euryarchaeota       | X | Picrophilus torridus                       |



|     |             |         |               |   |                            |
|-----|-------------|---------|---------------|---|----------------------------|
| pho | Prokaryotes | Archaea | Euryarchaeota | X | Pyrococcus horikoshii      |
| pab | Prokaryotes | Archaea | Euryarchaeota | X | Pyrococcus abyssi          |
| pfu | Prokaryotes | Archaea | Euryarchaeota | X | Pyrococcus furiosus        |
| tko | Prokaryotes | Archaea | Euryarchaeota | X | Thermococcus kodakaraensis |
| ape | Prokaryotes | Archaea | Crenarchaeota | X | Aeropyrum pernix           |
| smr | Prokaryotes | Archaea | Crenarchaeota | X | Staphylothermus marinus    |
| hbu | Prokaryotes | Archaea | Crenarchaeota | X | Hyperthermus butylicus     |
| ssu | Prokaryotes | Archaea | Crenarchaeota | X | Sulfolobus solfataricus    |
| sto | Prokaryotes | Archaea | Crenarchaeota | X | Sulfolobus tokodaii        |
| sai | Prokaryotes | Archaea | Crenarchaeota | X | Sulfolobus acidocaldarius  |
| pai | Prokaryotes | Archaea | Crenarchaeota | X | Pyrobaculum aerophilum     |
| pis | Prokaryotes | Archaea | Crenarchaeota | X | Pyrobaculum islandicum     |
| pcl | Prokaryotes | Archaea | Crenarchaeota | X | Pyrobaculum calidifontis   |
| tpe | Prokaryotes | Archaea | Crenarchaeota | X | Thermofilum pendens        |
| neq | Prokaryotes | Archaea | Nanoarchaeota | X | Nanoarchaeum equitans      |
